# Supplementary material for: A Comparison of Tools for Copy-Number Variation Detection in Germline Whole Exome and Whole Genome Sequencing Data
Source: MDPI journal article supplement (doi:10.3390/cancers13246283), 2021-12-14

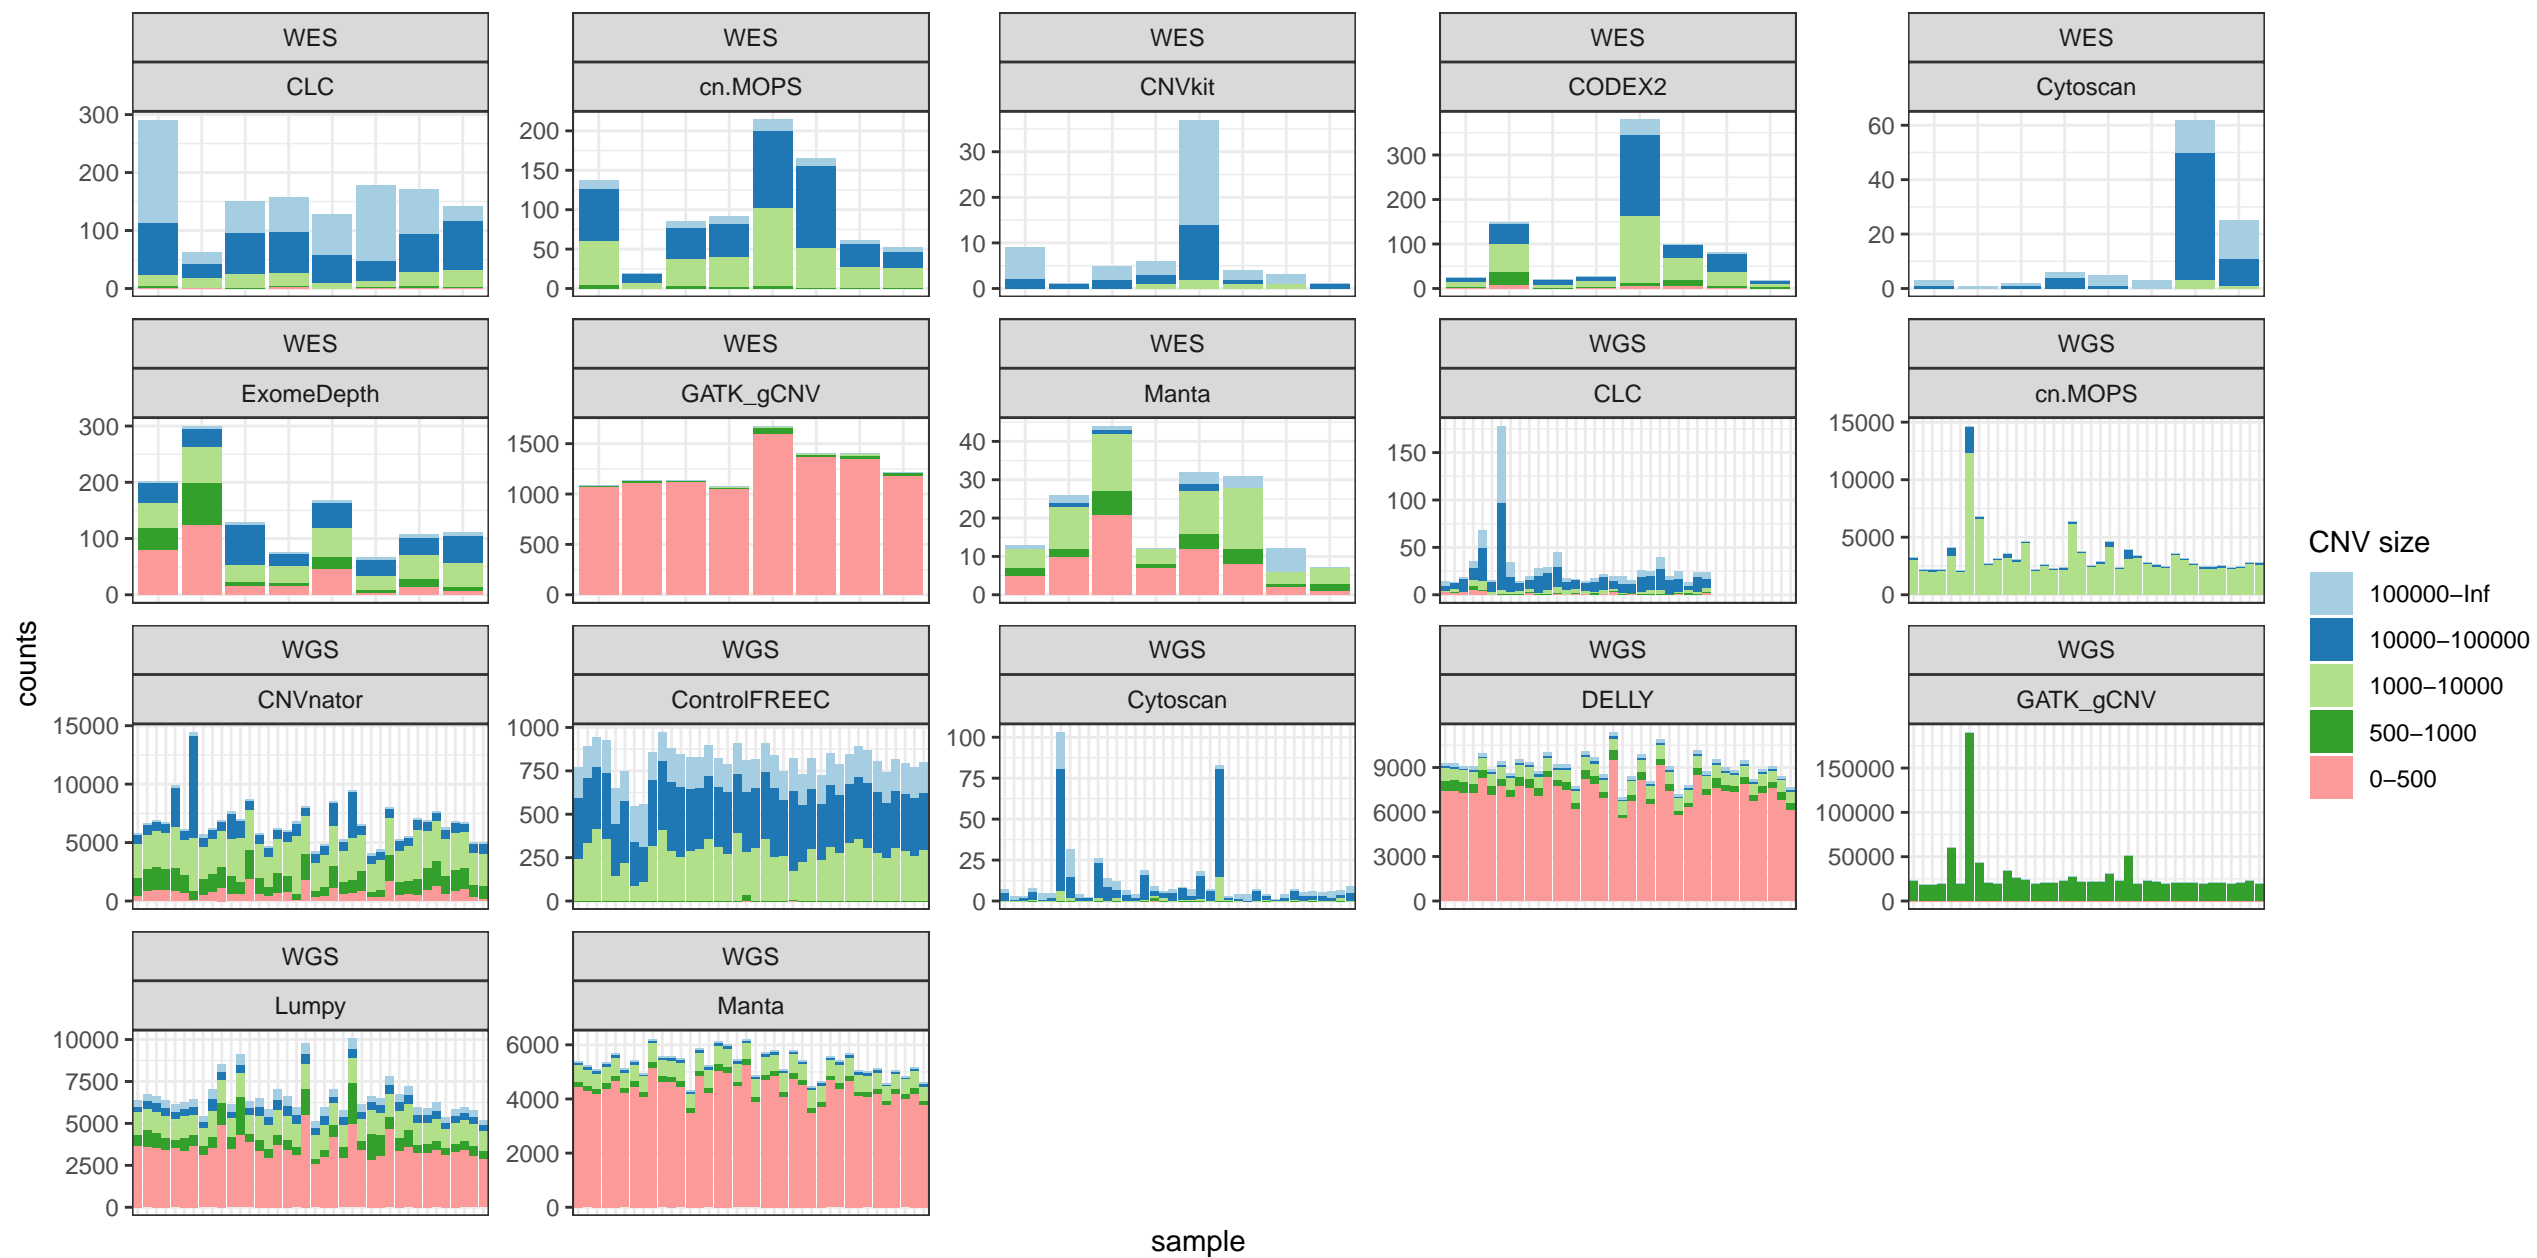

Supplement: s1 [file s1]
